# Supplementary material for: Mortality and cause of death in multiple sclerosis in western Norway 1950–2021: a registry-based linkage study
Source: PubMed Central journal article supplement — J Neurol Neurosurg Psychiatry. 2022 Sep 12;93(11):1154–61. doi: 10.1136/jnnp-2022-329169 (PMC9606487; doi:10.1136/jnnp-2022-329169), 2022-09-12
Supplement: jnnp-2022-329169supp001.pdf [file jnnp-2022-329169supp001.pdf]

**Online supplemental table 1 – Median age at death and median time (years) from onset to death with 95% confidence intervals (CI) by age at onset among deceased persons with multiple sclerosis in Hordaland and Møre and Romsdal counties, Western Norway**

| AGE AT ONSET                    |                        |                        |                       |                       |                       |
|---------------------------------|------------------------|------------------------|-----------------------|-----------------------|-----------------------|
|                                 | <20                    | 20-29                  | 30-39                 | 40-49                 | ≥50                   |
| <b>AGE AT DEATH</b>             |                        |                        |                       |                       |                       |
| <b>FEMALES</b>                  | <b>57 (49.0- 61.1)</b> | <b>61 (56.0-64.0)</b>  | <b>63 (60.0-65.0)</b> | <b>68 (66.3-71.0)</b> | <b>74 (71.0-79.0)</b> |
| ROMS <sup>a</sup>               | 57 (49.0-61.5)         | 59 (54.0-64.0)         | 63 (60.0-66.0)        | 68 (65.0-71.0)        | 74 (68.7-80.3)        |
| POMS <sup>b</sup>               | 58 (57.0-64.0)         | 65 (61.0-70.0)         | 62 (52.3-65.9)        | 71 (64.4-72.9)        | 76 (72.7-79.7)        |
| <b>MALES</b>                    | <b>53 (38.7-60.3)</b>  | <b>59 (56.0-61.0)</b>  | <b>62 (59.0-65.0)</b> | <b>70 (65.0-72.8)</b> | <b>72 (69.0-74.0)</b> |
| ROMS <sup>c</sup>               | 55 (41.8-65.0)         | 59 (56.0-64.0)         | 63 (59.9-65.1)        | 71 (63.9-73.1)        | 72 (69.0-74.7)        |
| POMS <sup>d</sup>               | 34 (24.0-60.0)         | 58 (52.9-61.5)         | 59 (52.1-66.0)        | 67 (63.0-73.0)        | 72 (66.0-77.0)        |
| <b>TOTAL</b>                    | <b>56 (49.0-60.0)</b>  | <b>59 (58.0-62.0)</b>  | <b>63 (60.0-64.0)</b> | <b>68 (66.2-71.0)</b> | <b>73 (71.0-75.0)</b> |
| <b>TIME FROM ONSET TO DEATH</b> |                        |                        |                       |                       |                       |
| <b>FEMALES</b>                  | <b>40 (33.9-44.9)</b>  | <b>35 (31.5- 39.1)</b> | <b>28 (25.4-30.0)</b> | <b>24 (22.0-25.4)</b> | <b>20 (17.6-22.6)</b> |
| ROMS <sup>a</sup>               | 40 (32.2- 45.1)        | 34 (28.7-37.7)         | 28 (25.8-30.7)        | 24 (21.5-25.4)        | 19 (11.6-25.4)        |
| POMS <sup>b</sup>               | 40 (38.8-46.4)         | 40 (34.5-45.3)         | 26 (19.5-32.2)        | 25 (18.6-27.6)        | 21 (16.8-22.9)        |
| <b>MALES</b>                    | <b>35 (21.8-45.3)</b>  | <b>34 (30.0-35.9)</b>  | <b>26 (24.1-29.7)</b> | <b>23 (21.3-26.3)</b> | <b>15 (13.9-19.5)</b> |
| ROMS <sup>c</sup>               | 36 (25.8-48.4)         | 34 (29.9-38.8)         | 28 (24.3-30.7)        | 23 (21.6- 27.1)       | 17 (14.1-21.0)        |
| POMS <sup>d</sup>               | 15 (8.0-45.2)          | 31 (25.7-34.9)         | 25 (16.9-30.6)        | 23 (19.3-30.5)        | 15 (13.2-22.7)        |
| <b>TOTAL</b>                    | <b>38 (33.3-43.8)</b>  | <b>34 (32.0-36.3)</b>  | <b>28 (25.7-29.5)</b> | <b>24 (22.1-25.4)</b> | <b>19 (15.2-20.6)</b> |

<sup>a</sup> n = 412

<sup>b</sup> n = 115

<sup>c</sup> n = 303

<sup>d</sup> n = 122
